# Supplementary figures and images for: The Recovery Group Project: Development of an Intervention Led Jointly by Peer and Professional Counselors
Source: Atypon-hosted journal article supplement (doi:10.1176/appi.ps.201200546), 2013-09-03

Figure 1. CONSORT diagram for cohorts 2 and 3.

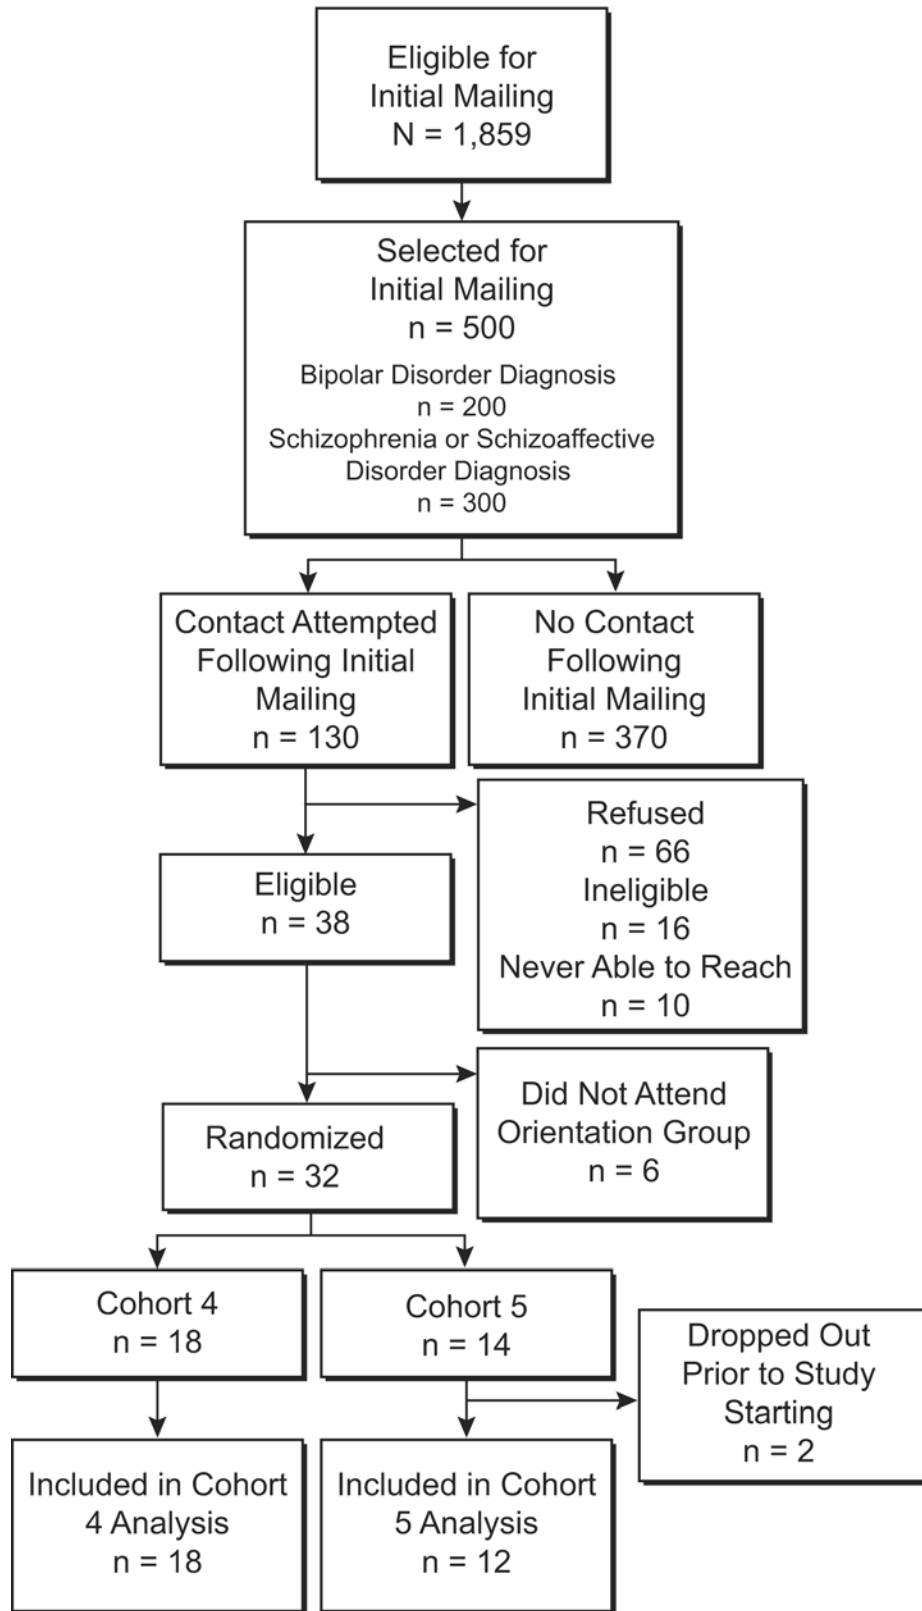

Supplement: 1211_ds001.pdf [file 1211_ds001.pdf]
